# Supplementary material for: Synthesis of hollow TiO2@N-doped carbon with enhanced electrochemical capacitance by an in situ hydrothermal process using hexamethylenetetramine
Source: Royal Society of Chemistry journal article supplement (doi:10.1039/c4ta00928b), 2014-01-01
Supplement: c4ta00928b1.pdf [file c4ta00928b1.pdf]

Electronic supplementary information (ESI) for Journal of Materials Chemistry A  
This journal is © The Royal Society of Chemistry 2014

## Electronic supplementary information

### Synthesis of hollow $\text{TiO}_2@N$ -doped carbon with enhanced electrochemical capacitance by *in-situ* hydrothermal process of hexamethylenetetramine†

*Jung Ho Kim, Dhruvajyoti Bhattacharjya and Jong -Sung Yu\**

*Department of Advanced Materials Chemistry, Korea University, 2511 Sejong-ro,  
Sejong 339-700, Republic of Korea. E-mail: jsyu212@korea.ac.kr*

**Surface characterization of hollow  $\text{TiO}_2 \cdot n\text{H}_2\text{O}@RF$  polymer, hollow  $\text{TiO}_2$  and hollow  $\text{TiO}_2@N$ -doped carbon:** Transmission electron microscope (TEM) images were obtained by an EM912 Omega electron microscope with an acceleration voltage of 120 kV. While high resolution-transmission electron microscope (HR-TEM) images were obtained by using JEM 2200-FS operated at 200 kV, high resolution-scanning electron microscope (HR-SEM) images by using Hitachi S-5500 operated at 30 kV. Powder X-ray diffraction (XRD) patterns of the samples were recorded by employing a Rigaku Smartlab diffractometer with Cu  $K\alpha$  radiation using a Ni  $\beta$ -filter at a scan rate of 0.2 °/min. The X-ray source was operated at 40 kV and 30 mA. Raman spectra were recorded by using Nanofinder<sup>®</sup>30 (Tokyo Instrument) in Micro-Raman spectrometer. Raman excitation at 488 nm was provided by diode-pumped solid-stage (DPSS) laser. A laser power of 1.011 mW was applied at the sample. X-ray photoelectron spectroscopy (XPS) measurements were obtained with an Escalab 250 XPS system with a monochromated Al  $K\alpha$  line source. Unsupported powder catalyst samples were mounted on carbon tape, and spectra were obtained with 40 eV pass energy, and at a 15 degree take-off angle from the normal surface. Binding energies were referenced to a graphite standard (C 1s = 284.6 eV). Thermogravimetric analyses (TGA) were carried out in air atmosphere using a Bruker TG-DTA3000SA analyzer. Nitrogen adsorption-desorption isotherms were measured at -196 °C using a Micromeritics ASAP 2020 system. Specific surface areas of the samples were determined by nitrogen adsorption branch in the relative pressure range from 0.05 to 0.2 using the Brunauer-Emmett-Teller (BET) equation. Total pore volumes were determined from the amount of gas adsorbed at the relative pressure of 0.99. Pore size distribution (PSD) was calculated from adsorption branch by the Barrett-Joyner-Halenda (BJH) method.

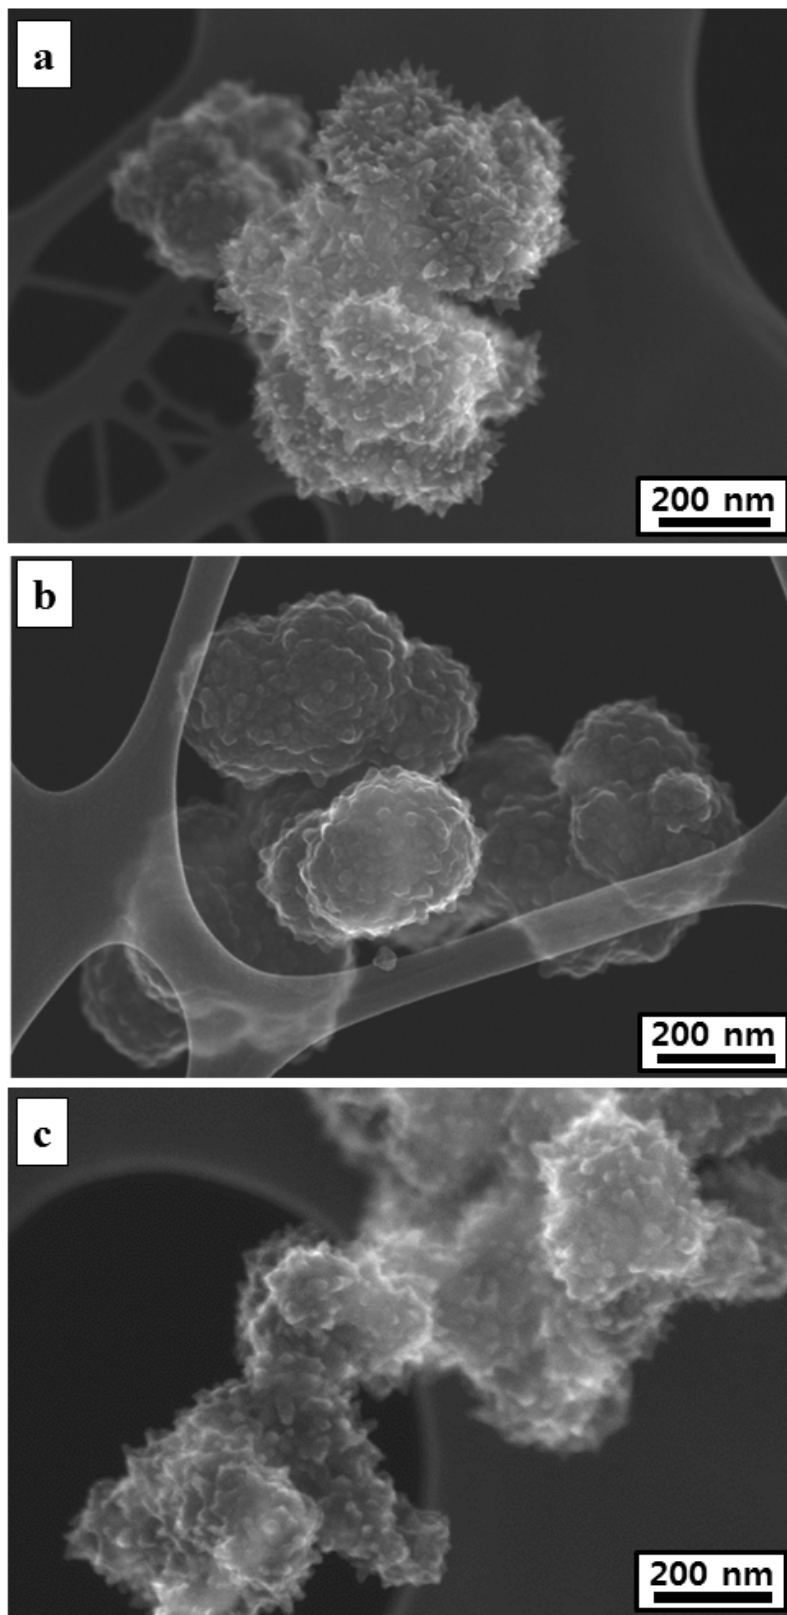

**Fig. S1** Representative HR-SEM images for (a) hollow  $\text{TiO}_2 \cdot n\text{H}_2\text{O}@\text{RF}$  polymer, (b) hollow  $\text{TiO}_2$  and (c) hollow  $\text{TiO}_2@\text{N}$ -doped carbon.

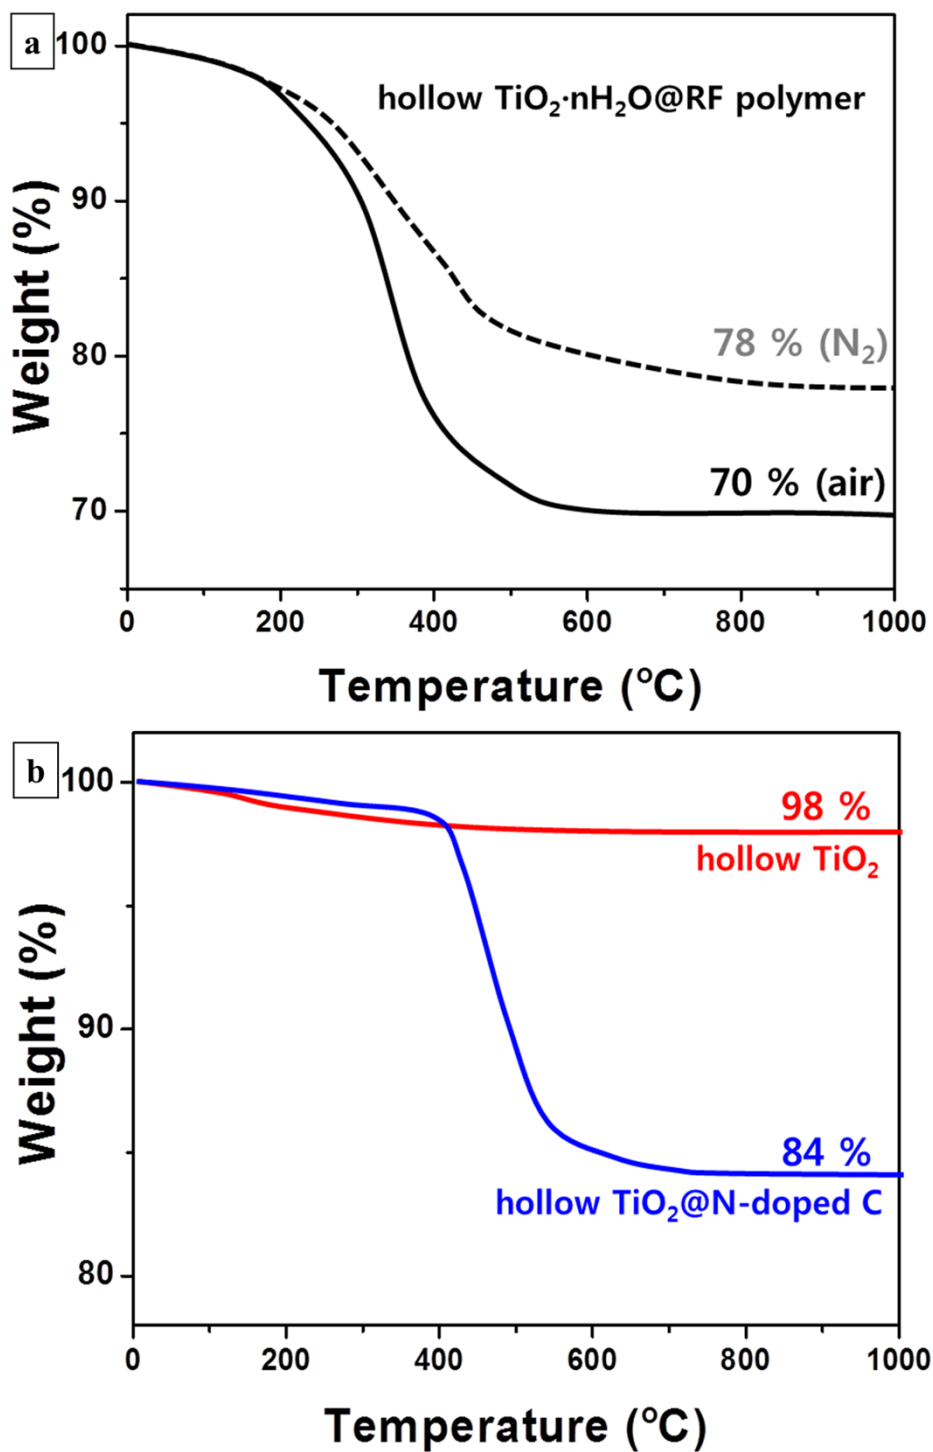

**Fig. S2** TGA profiles showing the change in weight as a function of calcination temperature for (a) hollow  $\text{TiO}_2 \cdot n\text{H}_2\text{O}@\text{RF}$  polymer with a heating rate of 5 °C/min under air and  $\text{N}_2$  atmosphere, and (b) hollow  $\text{TiO}_2$  and hollow  $\text{TiO}_2@\text{N-doped C}$  prepared at 600 °C with a heating rate of 5 °C/min under air.

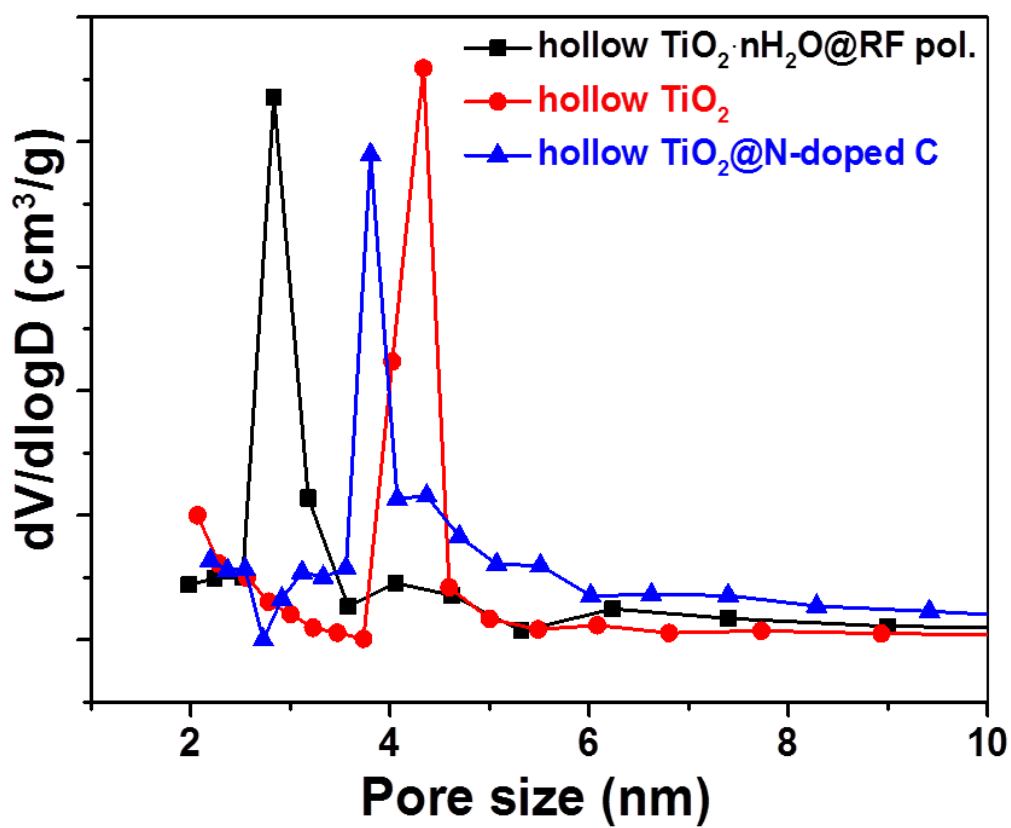

**Fig. S3** The pore size distribution curves for hollow  $\text{TiO}_2 \cdot n\text{H}_2\text{O}@\text{RF}$  polymer,  $\text{TiO}_2$  and  $\text{TiO}_2@\text{N-doped C}$  samples.

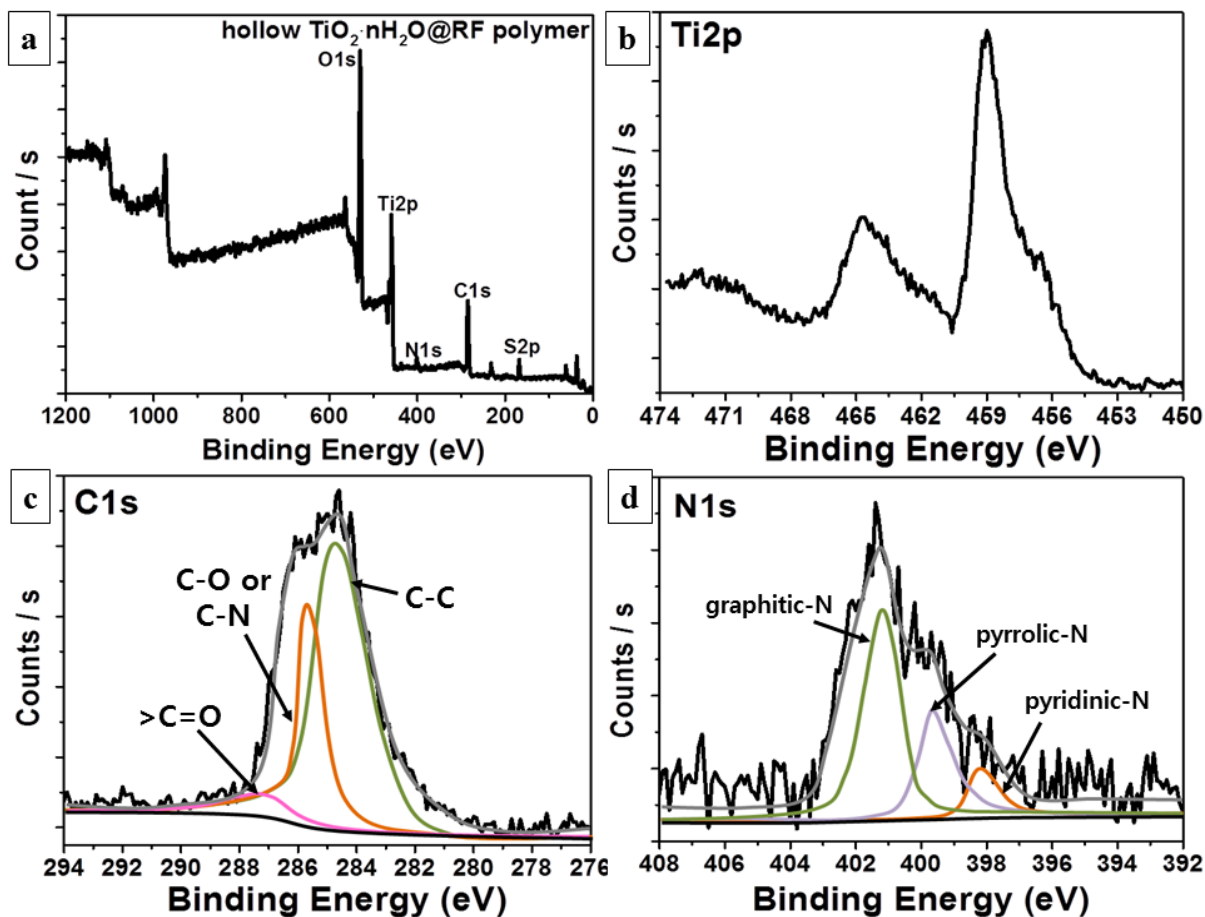

Fig. S4 XPS survey scan (a) for hollow  $\text{TiO}_2 \cdot n\text{H}_2\text{O}@\text{RF}$  polymer and corresponding narrow range XPS spectra and deconvoluted curves for (b) Ti 2p, (c) C 1s and (d) N 1s.

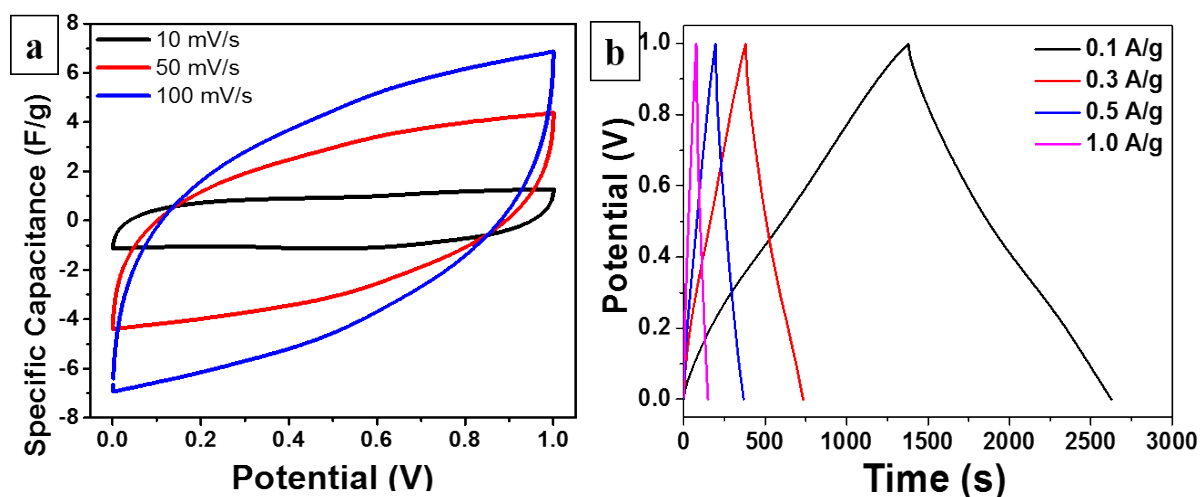

Fig. S5 (a) Cyclic voltammetry curves at scan rates of 10, 50, and 100 mV/s, and (b) galvanostatic charge-discharge curve at current densities of 0.1, 0.3, 0.5, and 1.0 A/g of hollow  $\text{TiO}_2@\text{N}$ -doped carbon.

**Table S1.** Nominal composition of TiO<sub>2</sub>·nH<sub>2</sub>O@RF polymer, hollow TiO<sub>2</sub> and TiO<sub>2</sub>@N-doped carbon prepared at 600 °C determined by XPS spectra.

| Element   | hollow TiO <sub>2</sub> ·nH <sub>2</sub> O@RF polymer |       | hollow TiO <sub>2</sub> |       | hollow TiO <sub>2</sub> @N-doped carbon |       |
|-----------|-------------------------------------------------------|-------|-------------------------|-------|-----------------------------------------|-------|
|           | at. %                                                 | wt. % | at. %                   | wt. % | at. %                                   | wt. % |
| <b>C</b>  | 33.68                                                 | 21.33 | 9.72                    | 5.02  | 44.50                                   | 28.44 |
| <b>N</b>  | 3.68                                                  | 2.72  | 1.68                    | 1.01  | 2.18                                    | 1.62  |
| <b>O</b>  | 47.18                                                 | 39.81 | 64.40                   | 44.25 | 38.90                                   | 33.12 |
| <b>Ti</b> | 11.97                                                 | 30.22 | 24.20                   | 49.72 | 14.42                                   | 36.82 |
| <b>S</b>  | 3.50                                                  | 5.92  | -                       | -     | -                                       | -     |

**Table S2.** Summary of fitted impedance parameters of hollow TiO<sub>2</sub> and hollow TiO<sub>2</sub>@N-doped carbon.

| Sample                                  | Solution resistance (R <sub>s</sub> ) Ω | Charge transfer resistance (R <sub>ct</sub> ) Ω | Warburg impedance (Z <sub>w</sub> ) Ω. sec <sup>-1/2</sup> | Capacitance (C) mF |
|-----------------------------------------|-----------------------------------------|-------------------------------------------------|------------------------------------------------------------|--------------------|
| hollow TiO <sub>2</sub>                 | 4.92                                    | 3.04                                            | 84.29                                                      | 200                |
| hollow TiO <sub>2</sub> @N-doped carbon | 2.95                                    | 1.81                                            | 81.95                                                      | 280                |
